# Supplementary material for: Nitro-substituted 3,3′-bis(indolyl)methane-modified silica gel as a sorbent for solid-phase extraction of flavonoids
Source: Royal Society of Chemistry journal article supplement (doi:10.1039/c4ra13861a), 2015-01-01
Supplement: c4ra13861a1.pdf [file c4ra13861a1.pdf]

**Table S-1**

Specific surface area ( $a_s$ ), total pore volume ( $v_p$ ), and average pore diameter ( $r_p$ ) of pure  $\text{SiO}_2$ , MWCNTs modified  $\text{SiO}_2$  and Nbim functionalized MWCNTs/ $\text{SiO}_2$

| Different particles          | Parameters                           |                                       |           |
|------------------------------|--------------------------------------|---------------------------------------|-----------|
|                              | $a_s$ ( $\text{m}^2 \text{g}^{-1}$ ) | $v_p$ ( $\text{cm}^3 \text{g}^{-1}$ ) | $r_p$ (Å) |
| Pure $\text{SiO}_2$          | 544.8334                             | 0.794891                              | 47.768    |
| Nbim modified $\text{SiO}_2$ | 366.0669                             | 0.461915                              | 42.858    |

**Table S-2**

optimum condition of extraction procedure of the developed method

| optimum condition | Extraction material  | Sample solution pH | Sample loading rate ( $\text{mL min}^{-1}$ ) | Eluent                                                 | Volume of eluent ( $\text{mL}$ ) | Elution rate ( $\text{mL min}^{-1}$ ) | Volume of sample loading ( $\text{mL}$ ) |
|-------------------|----------------------|--------------------|----------------------------------------------|--------------------------------------------------------|----------------------------------|---------------------------------------|------------------------------------------|
|                   | Nbim-modified silica | 4                  | 1.5                                          | 1% $\text{CH}_3\text{COOH}-\text{CH}_3\text{OH}$ (V:V) | 1                                | 0.5                                   | 30                                       |

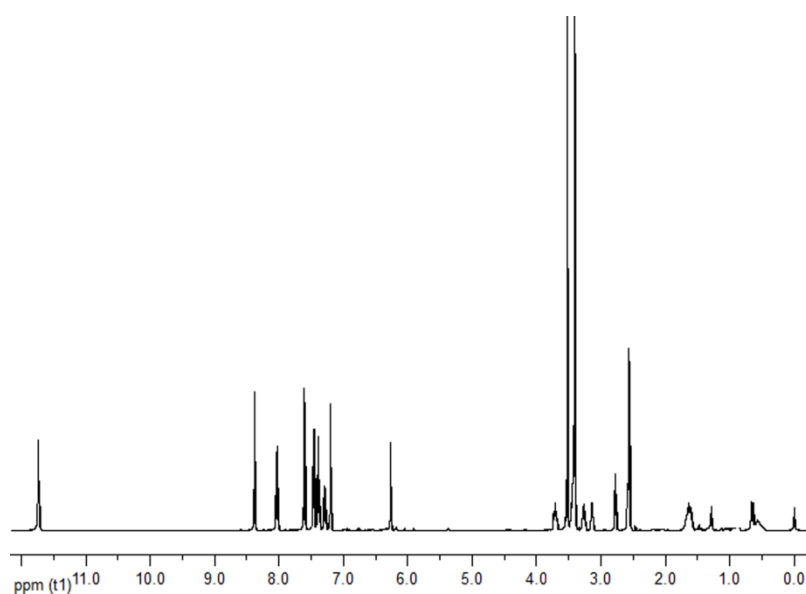

Fig. S-1  $^1\text{H}$  NMR spectrum of the product of the first step of Fig. 2(a)

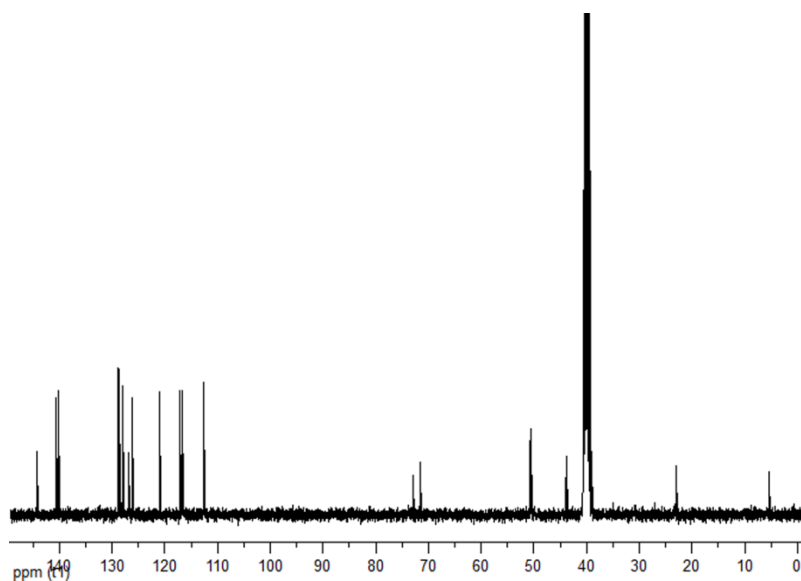

Fig. S-2  $^{13}\text{C}$  NMR spectrum of the product of the first step of Fig. 2(a)

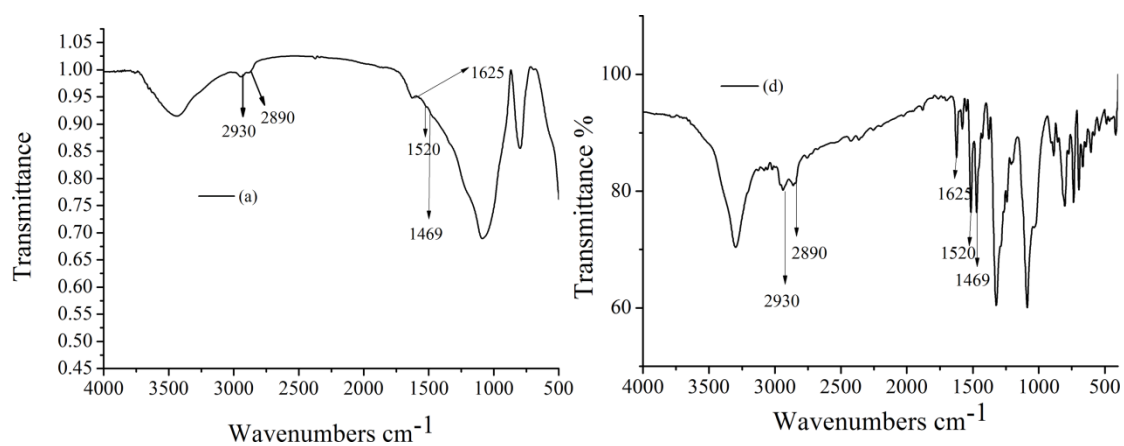

Fig. S-3 FT-IR of Nbim-modified silica (a), the product of the first step of fig. 2(a) (d).
